# Supplementary material for: Psychological Stress Deteriorates Skin Barrier Function by Activating 11β-Hydroxysteroid Dehydrogenase 1 and the HPA Axis
Source: PubMed Central journal article supplement (PMC5910426; doi:10.1038/s41598-018-24653-z), 2018-04-20
Supplement: 41598_2018_24653_MOESM1_ESM.pdf [file 41598_2018_24653_MOESM1_ESM.pdf]

2 **Psychological Stress Deteriorates Skin Barrier Function**  
3 **by Activating 11 $\beta$ -Hydroxysteroid Dehydrogenase 1**  
4 **and the HPA Axis**

5  
6 *Sung Jay Choe\**, *Donghye Kim\**, *Eun Jung Kim\**, *Joung-Sook Ahn<sup>†</sup>*, *Eun-Jeong Choi<sup>‡</sup>*,

7 *Eui Dong Son<sup>‡</sup>*, *Tae Ryong Lee<sup>‡</sup>*, *Eung Ho Choi\**

8  
9 *\*Department of Dermatology, Yonsei University Wonju College of Medicine, Wonju, Korea,*

10 *<sup>†</sup>Department of Psychiatry, Yonsei University Wonju College of Medicine, Wonju, Korea,*

11 *<sup>‡</sup>AmorePacific Corp/R&D Unit, Yongin, Korea*

12  
13  
14 **Supplementary Figure S1. Expression of inflammatory cytokines in the stratum corneum was decreased**  
15 **under PS. (A) IL-1 $\alpha$ , (B) TNF- $\alpha$ , and (C) IL-6 expression was decreased under PS compared to NL.**

16 **Supplementary Figure S2. SC cortisol is regulated by 11 $\beta$ -HSD1 activation in epidermal keratinocytes and**  
17 **is mainly affected by cortisol in SC the intercellular space.** Protein expression of 11 $\beta$ -HSD1 increased in the  
18 both UV-exposed skins compared to sham-light exposed skin. **(A)** Epidermal 11 $\beta$ -HSD1 staining intensity  
19 appeared greater in UV-exposed skin versus sham-light exposed skin under de-melanin stain. **(B)** Western blot  
20 image quantification confirmed increased expression of 11 $\beta$ -HSD1 in UV-exposed skin versus sham-light exposed  
21 skin. **(C)** Cortisol of the stratum corneum was increased in “UVB+Veh” skin compared to “sham-light+Veh” and  
22 “UVB+11 $\beta$ -HSD1 inh” skins. **(D)** No significant difference in the cortisol of the corneocyte was observed due to  
23 UV irradiation or 11 $\beta$ -HSD1 inhibitor application. Changes in cortisol of the intercorneocyte space **(E)** and  
24 epidermis **(F)** were similar to those in the whole stratum corneum **(C)**. **(G)** When the 11 $\beta$ -HSD1 inhibitor applied  
25 group was excluded, 11 $\beta$ -HSD1 protein expression in the epidermis was positively correlated with cortisol in the  
26 whole stratum corneum (blue), and intercorneocyte space (black) but was not correlated with corneocyte levels  
27 (red). **(H)** 11 $\beta$ -HSD1 protein expression in the epidermis was also positively correlated with cortisol in the  
28 epidermis (orange).

29 **Supplementary Figure S3. Expression of 11 $\beta$ -HSD1 in oral mucosal cells of patients with anxiety disorder**  
30 **or depression negatively correlated with skin barrier function and positively with SC cortisol before and**  
31 **after SSRI treatment.**

32 Expression of 11 $\beta$ -HSD1 protein was positively correlated with the levels of SC cortisol **(A)** and negatively  
33 correlated with SC integrity **(B)**. Changes in SC hydration **(C)** also showed positive correlation with 11 $\beta$ -HSD1  
34 protein level but this effect was not statistically significant. The levels of SC cortisol positively correlated with  
35 SC integrity but this effect was not statistically significant **(D)**. \*SC integrity = delta TEWL= PS TEWL (Post  
36 stripping with D-squame 15 times) - Basal TEWL.

38 **Supplementary Figure S1. Expression of inflammatory cytokines in the stratum corneum was decreased**  
39 **under PS (n=25).**

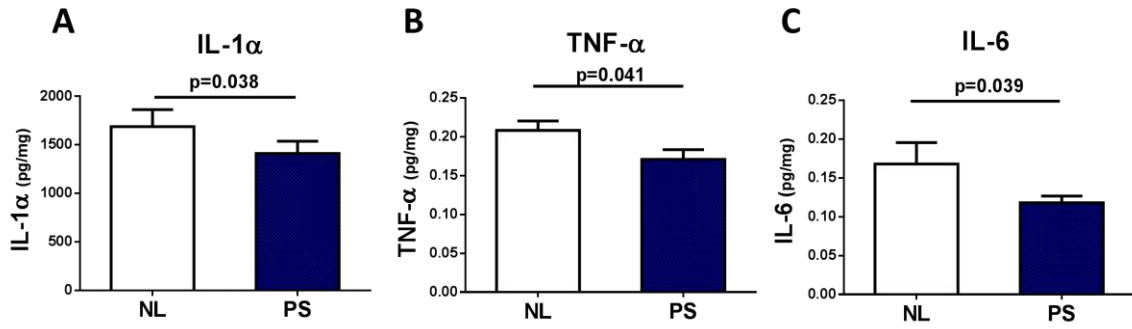

40

41 **Supplementary Figure S2. SC cortisol is regulated by 11 $\beta$ -HSD1 activation in epidermal keratinocytes and**  
 42 **is mainly affected by cortisol in SC the intercellular space (n=5).**  
 43

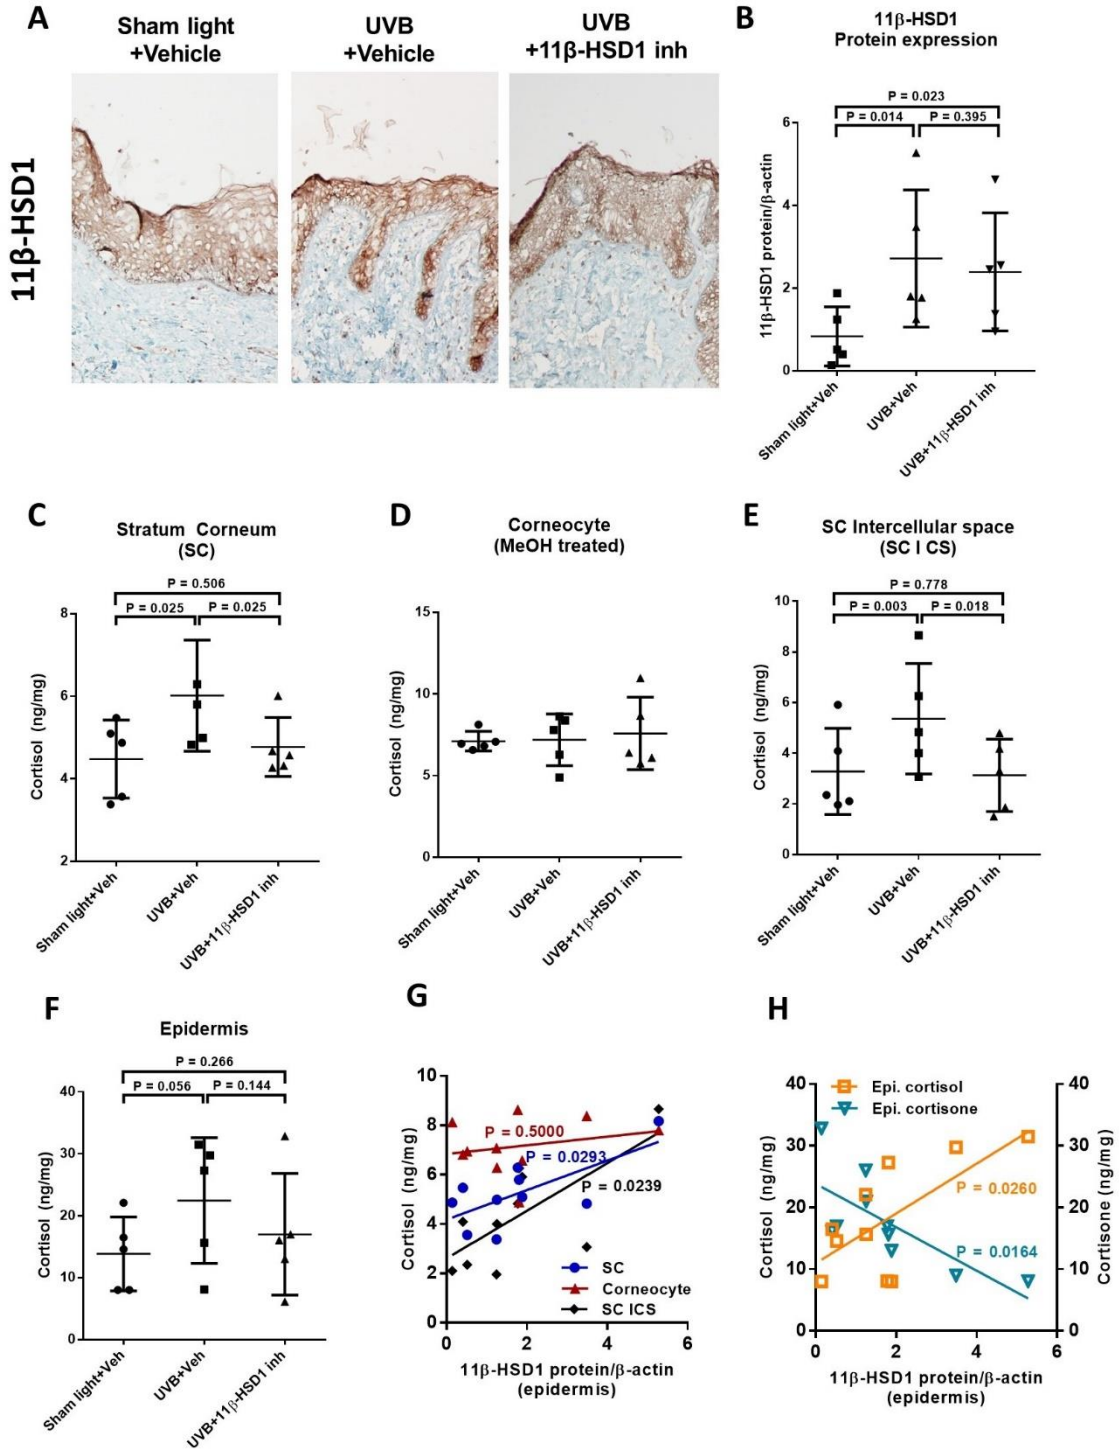

44  
 45

46 **Supplementary Figure S3. Expression of 11 $\beta$ -HSD1 in oral mucosal cells of patients with anxiety disorder**  
47 **or depression negatively correlated with skin barrier function and positively with SC cortisol before and**  
48 **after SSRI treatment.**

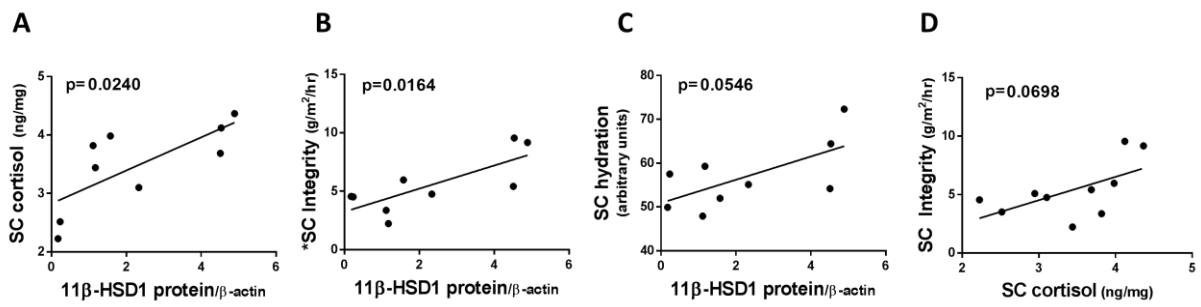

49

50
